# Supplementary material for: Daikenchuto ameliorates dextran sulfate sodium-induced acute and chronic ulcerative colitis by regulating gut microbiota-derived indoles to activate AhR signaling
Source: Research Square preprint supplement (doi:10.21203/rs.3.rs-7691083/v1), 2025-10-12
Supplement: Supplementary file 1 [file 5f48a8c314047279397cdeb9.xlsx]

## Sheet: Additional file 1
Additional file 1. Identified chemical constituents of DKT
No.	Component	tR (min)	Formula	Theoretical mass (m/z )	Observed mass ( m/z)	Mass error (ppm)	Ion	Fragment ion (m/z )
1	[(3S)-3,7-dimethyloct-6-enyl] acetate/(S)-citronellol acetate	3.36	C12H22O2	198.162	237.125	-2.5	[M+K]+	177.106
2	(+)-magnoflorine	3.43	C20H24NO4	342.171	360.205	2.5	[M+NH4]+	315.207	227.176
3	Farnesene	3.44	C15H24	204.188	227.176	-2.5	[M+Na]+	105.071	119.086	107.085	133.101
4	Cuminol	3.63	C10H14O	150.105	173.094	3.1	[M+Na]+	77.0394	91.0553	103.055
5	Shyobunone	3.73	C15H24O	220.183	243.171	-4	[M+Na]+	93.0712	95.0857	112.086	121.101
6	Suffruticoside A	3.8	C27H32O16	612.169	611.163	2	[M-H]-	593.153	415.124	546.14
7	zanthobungeanine	4.59	C16H17NO3	271.121	272.129	4.7	[M+H]+	256.104	243.089	107.051
8	copaene	4.67	C15H24	204.188	227.176	-4.4	[M+Na]+	128.062	105.071	129.071
9	Zingerol	5.01	C11H16O3	196.11	235.073	-1.5	[M+K]+	179.108	135.045	105.035
10	cis-nerolidol	5.02	C15H26O	222.198	245.187	-1.7	[M+Na]+	223.074	207.082	191.087
11	beta-Selinene	5.45	C15H24	204.188	227.176	-3.6	[M+Na]+	121.066	109.101	78.0478
12	Campherenol	6.06	C15H26O	222.198	245.187	-2	[M+Na]+	121.102	208.181
13	rutin	6.31	C27H30O16	610.153	609.146	0.5	[M-H]-	300.028	465.102	451.124
14	6-gingesulfonic acid	6.62	C17H26O6S	358.145	359.151	-4.5	[M+H]+	135.08	151.076	167.072
15	Dianthramine	6.65	C14H11NO6	289.059	288.052	2.7	[M-H]-	198.056	93.0349
16	Hyperin	6.87	C21H20O12	464.096	463.089	1.1	[M-H]-	283.022	300.028	176.012
17	Skimmetin	7.06	C9H6O3	162.032	161.025	1.6	[M-H]-	117.035	133.03
18	Haplopine	7.11	C13H11NO4	245.069	246.077	3.5	[M+H]+	230.045	213.043	212.036	231.052	188.035
19	Gingerenone A	7.31	C21H24O5	356.162	374.195	-1.9	[M+NH4]+	131.05	137.061	193.088	177.092	311.127
20	L-Adenosine	7.79	C10H13N5O4	267.097	285.129	-4.1	[M+NH4]+	233.092	191.07	202.084	200.068
21	Diosmin	7.95	C28H33O15	608.174	609.181	-0.3	[M+H]+	463.124	301.071	286.047	258.053
22	(+)-alpha-Curcumene/alpha-Curcumene	8	C15H22	202.172	203.18	4.5	[M+H]+	102.047	91.0552	79.0551
23	Xanthorrhizol	8.16	C15H22O	218.167	219.175	4.3	[M+H]+	95.051	191.108
24	Notoginsenoside N	8.3	C48H82O19	962.545	961.542	4.4	[M-H]-	799.486	637.433	619.422	475.38	391.286
25	Notoginsenoside R1	8.55	C47H80O18	932.534	931.531	4.5	[M-H]-	799.486	475.38	637.432	391.286
26	zingerone	8.58	C11H14O3	194.094	195.101	-4.4	[M+H]+	163.076	145.066
27	dl-Biotin	8.84	C10H16N2O3S	244.088	283.051	0.8	[M+K]+	227.062	209.05	189.093
28	Ginsenoside Rg1 a	9.1	C42H72O14	800.492	799.488	4.1	[M-H]-	637.432	475.379
29	Ginsenoside Re a	9.19	C48H82O18	946.55	945.547	4.6	[M-H]-	799.486	637.432	475.379	783.49
30	Terragon	9.61	C10H12O	148.089	149.096	2.9	[M+H]+	121.066
31	(+)-syringaresinol	10	C22H26O8	418.163	419.168	-4.7	[M+H]+	401.16	167.07	207.102
32	(-)-decursinol	10.11	C14H14O4	246.089	247.097	2.8	[M+H]+	229.087	213.055	185.061	175.04	147.045
33	20(R)-ginsenoside Rg2	10.39	C42H72O13	784.497	785.504	-0.9	[M+H]+	476.281	405.35	423.361	476.281
34	(-)-columbianetin	10.5	C14H14O4	246.089	247.096	0.2	[M+H]+	229.087	213.056	175.035	159.045	103.056	77.0397
35	Gingerenone B	12	C22H26O6	386.173	387.181	1.5	[M+H]+	369.17	207.103	193.088	137.061
36	Methyl-10-Gingerol	12.14	C22H36O4	364.261	403.225	2	[M+K]+	145.027	177.093	193.049
37	Notoginsenoside R4	12.25	C59H100O27	1240.64	1239.64	3.3	[M-H]-	1077.59	945.544	783.49	621.436	459.383
38	eugenol	12.43	C10H12O2	164.084	165.092	4.8	[M+H]+	137.061	131.051	94.0428	122.037
39	3,5-Dimethyl-p-anisic acid	12.44	C10H12O3	180.079	179.071	0.9	[M-H]-	165.055	164.048
40	4-Gingerol	12.54	C15H22O	266.152	289.142	2.5	[M+Na]+	217.12	147.046	192.079
41	Ginsenoside Rb1 a	12.68	C54H92O23	1108.6	1107.6	4.1	[M-H]-	945.545	783.491	621.438	459.385	323.099
42	dictamine	12.74	C12H10NO2	199.063	222.053	3.5	[M+Na]+	207.03	194.054
43	Skimmianine a	12.81	C14H14NO4	259.084	260.093	5.1	[M+H]+	224.062	227.059	216.067	199.064	184.041
44	ginsenoside-Rb2	12.84	C53H90O22	1078.59	1077.59	4.6	[M-H]-	945.545	915.535	783.491
45	Kaempferol-3-arabofuranoside	12.88	C20H18O10	418.09	417.084	2.1	[M-H]-	399.072	385.094	355.083	295.046
46	Ginsenoside F3	12.93	C41H70O13	770.482	769.477	2.9	[M-H]-	637.432	475.379	391.286
47	Ginsenoside Rh3	13.02	C36H60O7	604.434	605.442	1.9	[M+H]+	587.427	425.378	407.367
48	ginsenoside Ro	13.16	C48H76O19	956.498	955.494	3.4	[M-H]-	793.438	613.375	455.353
49	20(R)-Notoginsenoside R2	13.17	C41H70O13	770.482	769.478	4.4	[M-H]-	769.475	637.432	475.378	391.286
50	Sexangularetin	13.25	C16H12O7	316.058	317.065	-1.6	[M+H]+	301.073	286.047	193.05
51	Araloside A	13.37	C47H74O18	926.487	925.484	4	[M-H]-	791.419	569.384	700.423
52	panaxynol	13.47	C17H24O	244.183	262.218	4.8	[M+NH4]+	203.143	133.065	105.071	91.0556
53	4-Shogaol	13.73	C15H20O3	248.141	249.149	1.8	[M+H]+	177.091	137.061	179.071
54	6-gingediol	14.44	C17H28O4	296.199	319.188	1.2	[M+Na]+	261.186	229.159	177.092	163.077	137.061	131.05
55	Isogingerenone-B	14.6	C2H26O6	386.173	385.166	1.2	[M-H]-	263.129	201.018	187.078	161.062	122.037
56	(Z,Z)-farnesol	14.76	C15H26O	222.198	240.233	4.1	[M+NH4]+	189.162	175.147	147.116
57	Methyleugenol	14.8	C11H14O2	178.099	179.107	4	[M+H]+	163.077	137.061	147.046	146.07	131.05
58	spathulenol	14.92	C15H24O	220.183	221.191	4.7	[M+H]+	203.18	187.148	144.09
59	Neryl propionate	15.06	C13H22O2	210.162	209.155	0.8	[M-H]-	149.06	193.122
60	6-gingerol a	15.31	C17H26O4	294.183	317.173	1.2	[M+Na]+	137.061	177.092	259.172	277.177	227.144	145.066
61	Schinifoline	15.53	C17H23NO	257.178	258.186	3.9	[M+H]+	242.152	186.093	173.085	158.061	144.082	132.083
62	Ginsenoside F2	15.66	C42H72O13	784.497	783.493	3.5	[M-H]-	621.437	459.385	375.29
63	decarine	15.77	C19H13NO4	319.084	320.092	1.8	[M+H]+	305.07	277.072
64	Ginsenoside-Rg3	15.88	C42H72O13	784.497	783.492	2.3	[M-H]-	621.437	459.384	375.291
65	osthenol	16	C14H14O3	230.094	231.103	4.3	[M+H]+	175.04	147.045	160.085
66	Methyl-6-Gingerol	16.71	C18H28O4	308.199	331.189	2.2	[M+Na]+	290.187	151.077	177.091	146.071	136.053
67	6-Gingerdione	17.4	C17H24O4	292.168	293.175	1.8	[M+H]+	131.051	137.061	163.077	177.093	233.153
68	8-Gingerol/8-Shogaol	18.6	C19H30O4	322.214	345.203	-2	[M+Na]+	163.077	137.061	131.049	287.2	305.212
69	6-shogaol a	18.73	C17H24O3	276.173	277.179	-3.2	[M+H]+	137.061	259.169	122.036
70	Norchelerythrine	20.94	C20H15NO4	333.1	334.108	1.2	[M+H]+	318.077
71	8-Gingerdione	21.22	C19H28O4	320.199	321.207	2.2	[M+H]+	131.05	137.061	163.076	177.091
72	6-Dehydrogingerdione	22.19	C17H22O4	290.152	291.159	0.4	[M+H]+	137.061	177.053
73	10-Shogaol	23.19	C21H32O3	332.235	333.243	1.9	[M+H]+	315.23	177.092	137.061	117.071	145.066	197.191
74	DBP	23.97	C16H22O4	278.152	301.141	0.4	[M+Na]+	149.025	121.029	105.037
